# Supplementary material for: Sessile serrated lesion detection rates during average risk screening colonoscopy: A systematic review and meta-analysis of the published literature
Source: PubMed Central journal article supplement — Endosc Int Open. 2021 Apr 13;9(4):E610–20. doi: 10.1055/a-1352-4095 (PMC8043815; doi:10.1055/a-1352-4095), 2021-04-13
Supplement: 2187supmat_10-1055-a-1352-4095.pdf [file 2187supmat_10-1055-a-1352-4095.pdf]

## Supplementary material

Supplementary Figure 1. Forest plot of pooled SDR from large studies only (N>1000)

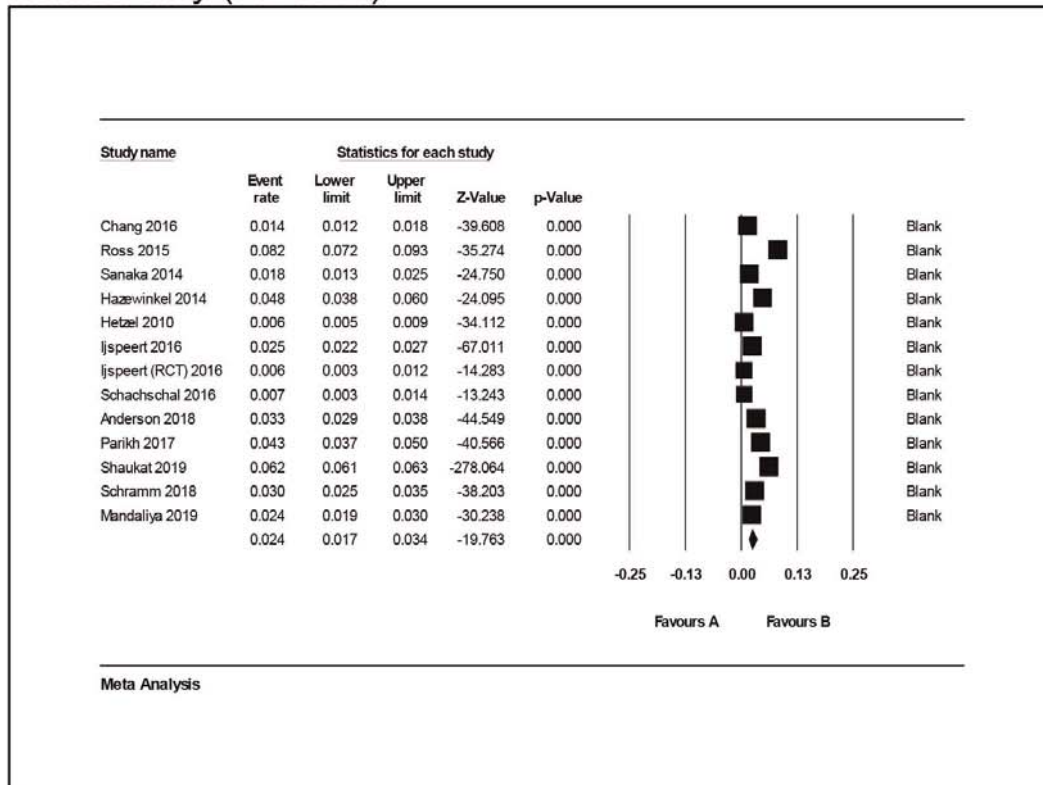

Supplementary Figure 2. Forest plot of pooled SDR from prospective studies only

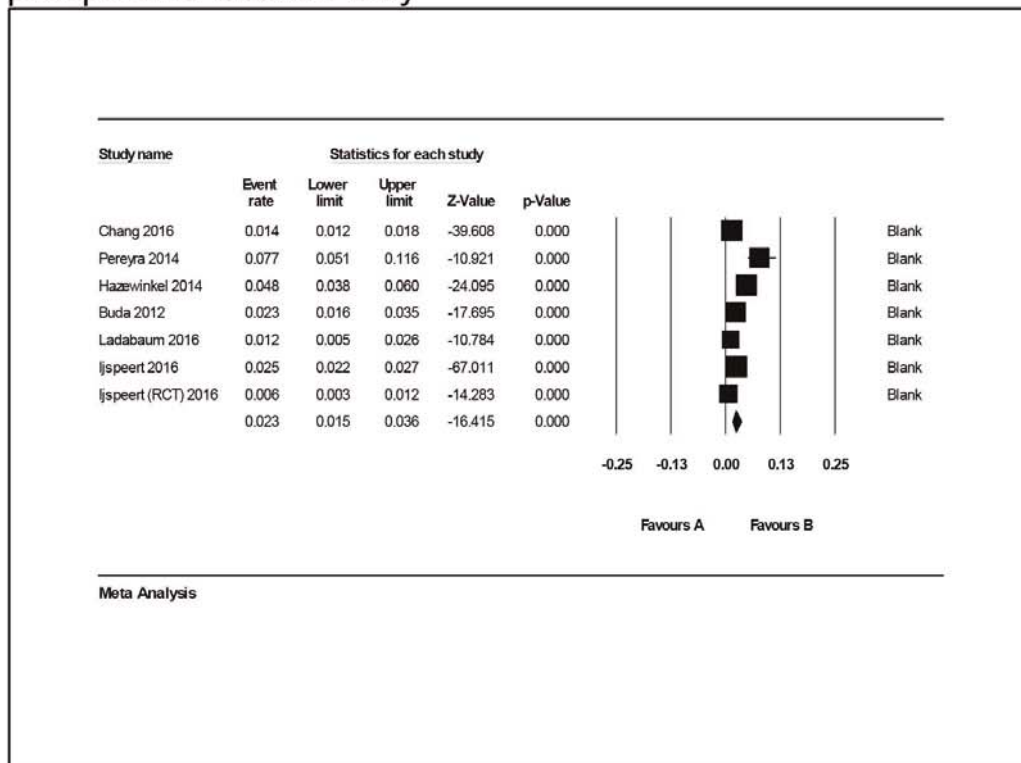

## Supplementary material

Supplementary Figure 3. Pooled rate of PSPDR of only large studies (n>1000)

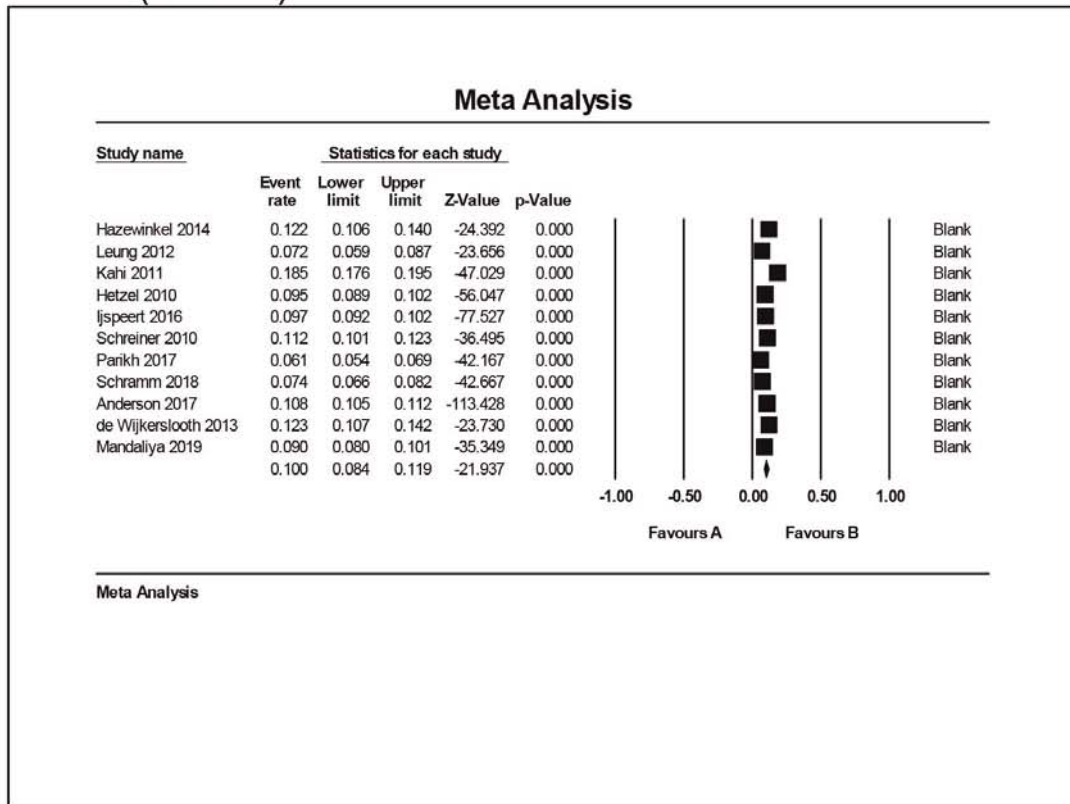

Supplementary Figure 4. Forest plot of pooled rate of PSPDR from prospective studies only

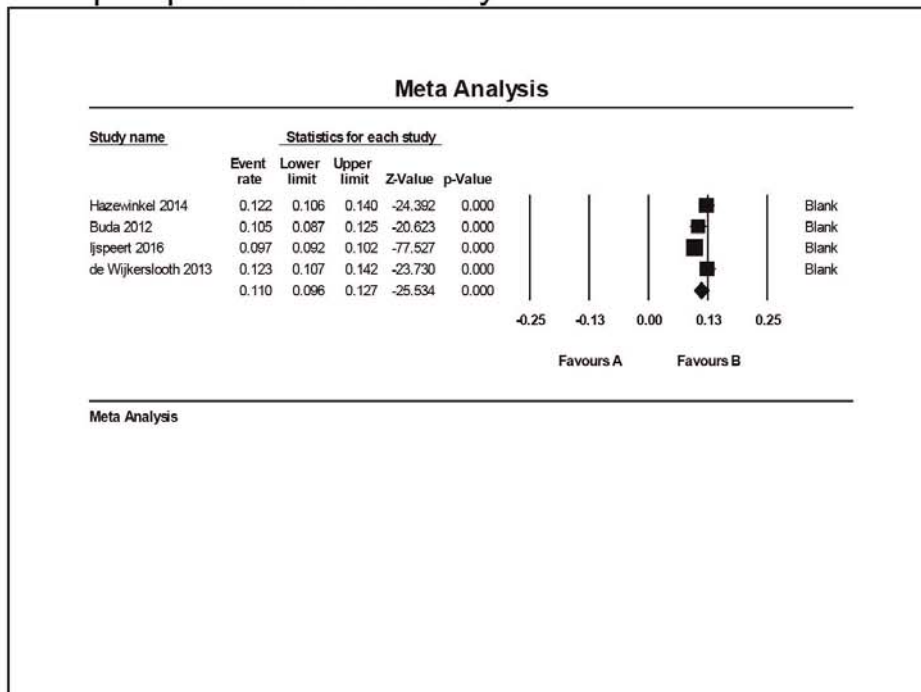

## Supplementary material

Supplementary Figure 5. Forest plot of pooled rate of any large SP detection rate

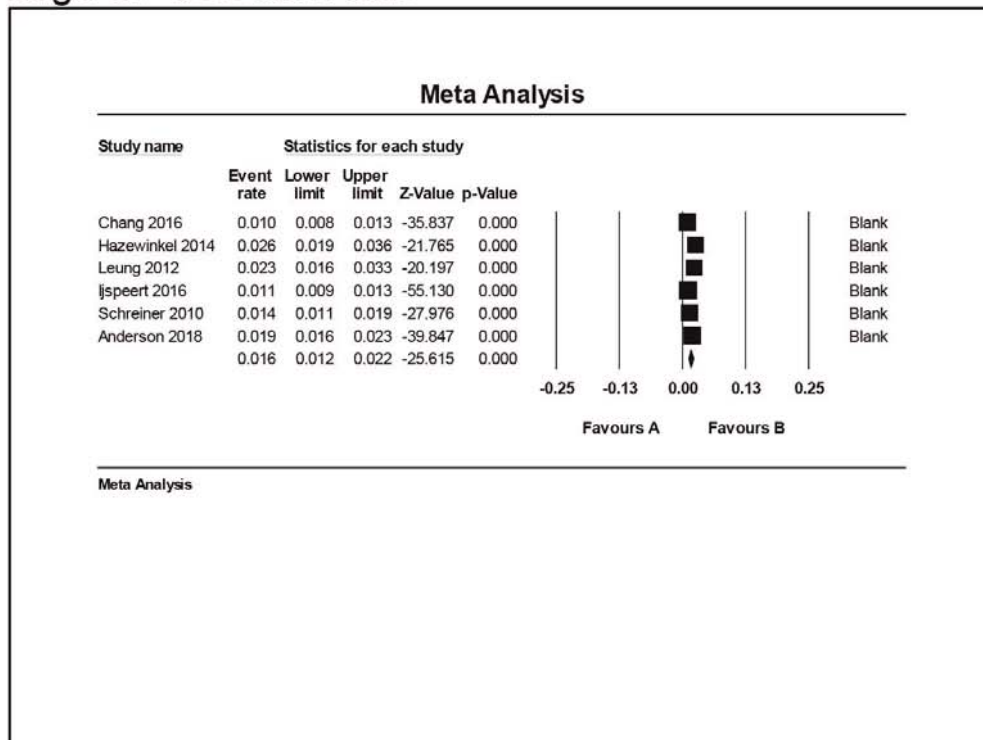

Supplementary Figure 6. Pooled rate of large SSL detection rate

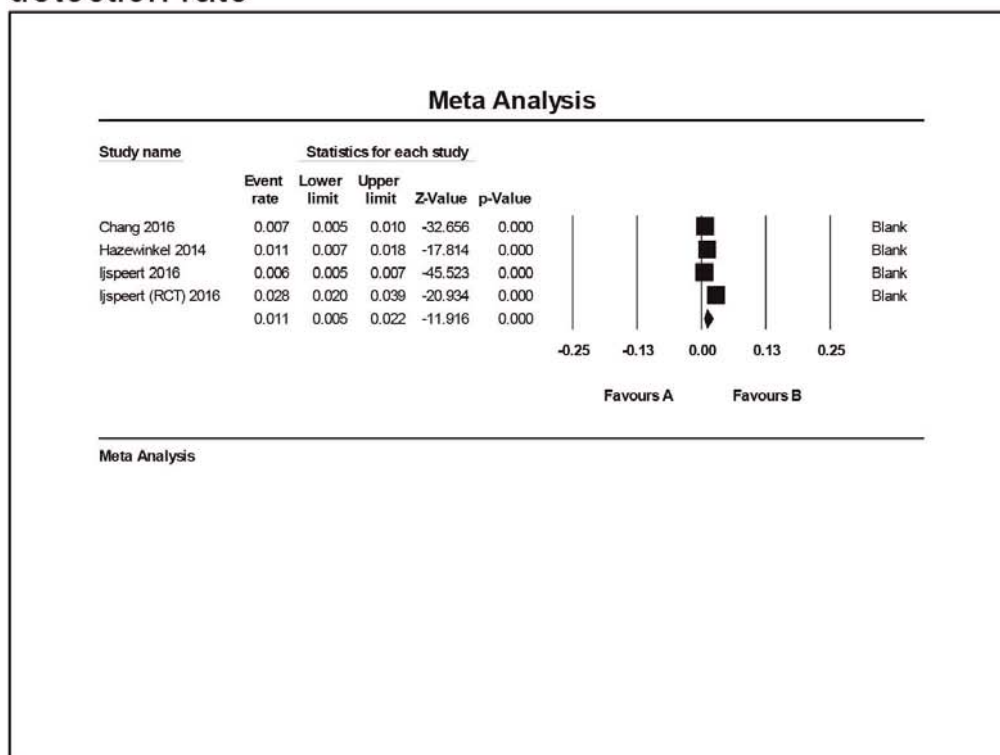

## Supplementary material

### Supplementary Figure 7. Pooled detection rate of proximal SSL

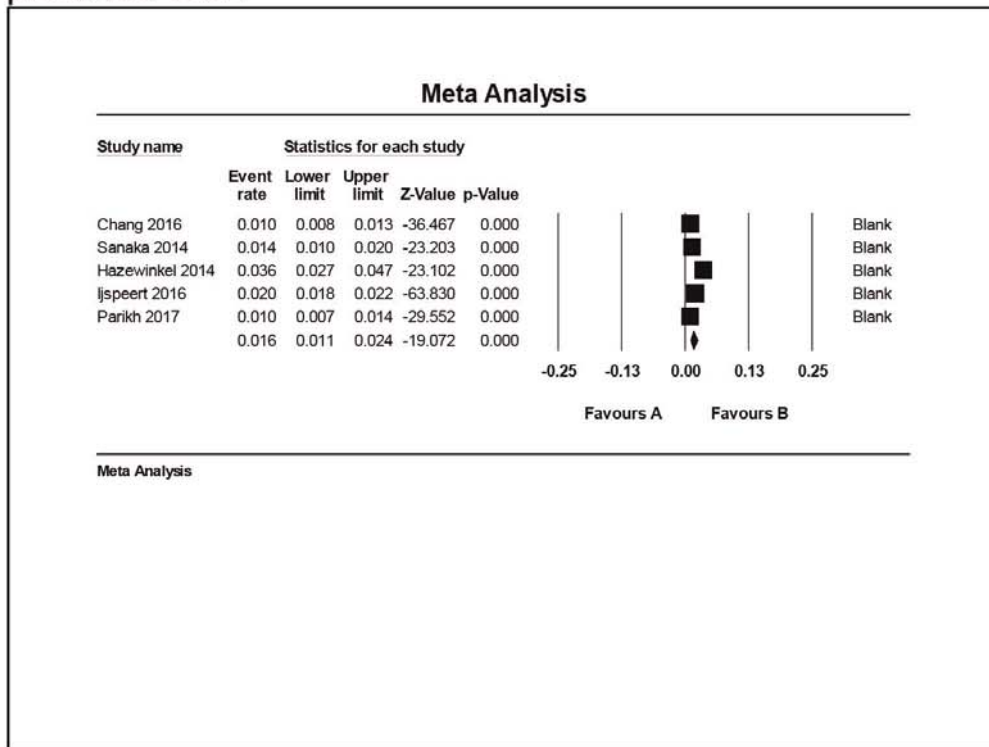

### Supplementary Figure 8. Pooled detection rate of SSL with dysplasia

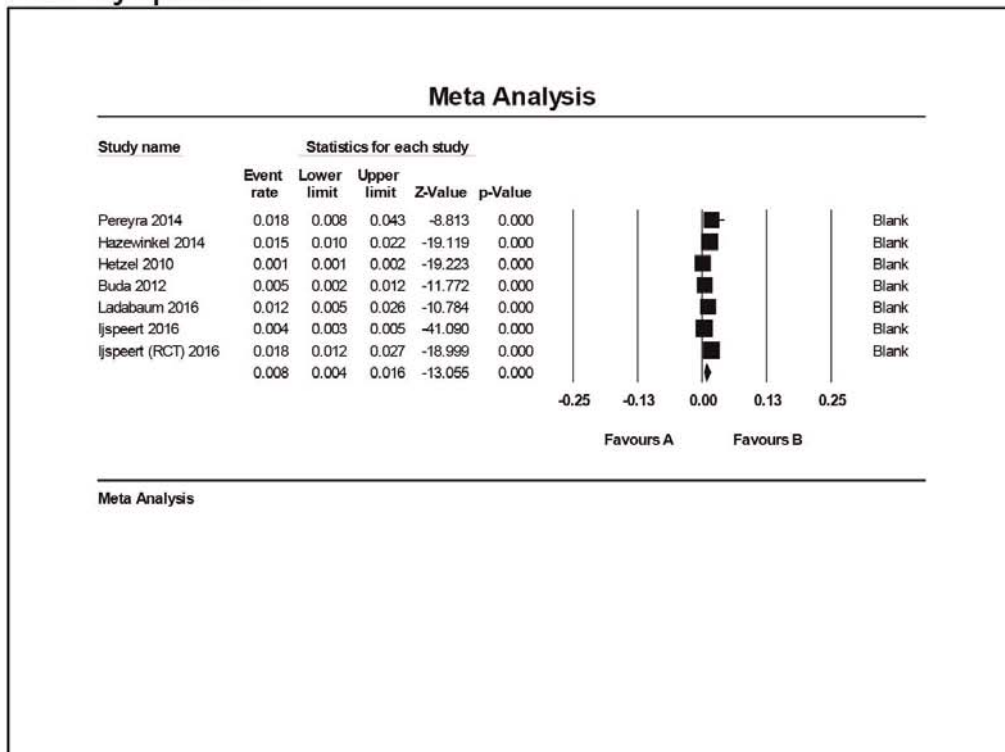

## Supplementary material

### Supplementary figure 9. Pooled detection rate of clinically significant serrated polyp rate

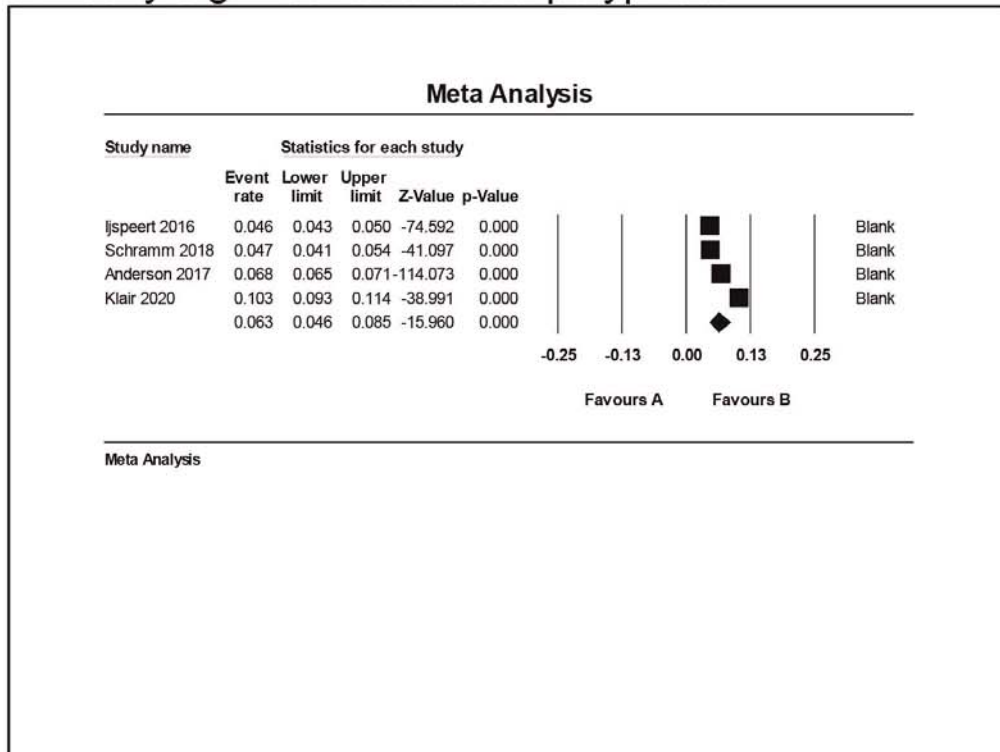

### Supplementary figure 10. Pooled detection rate of TSA

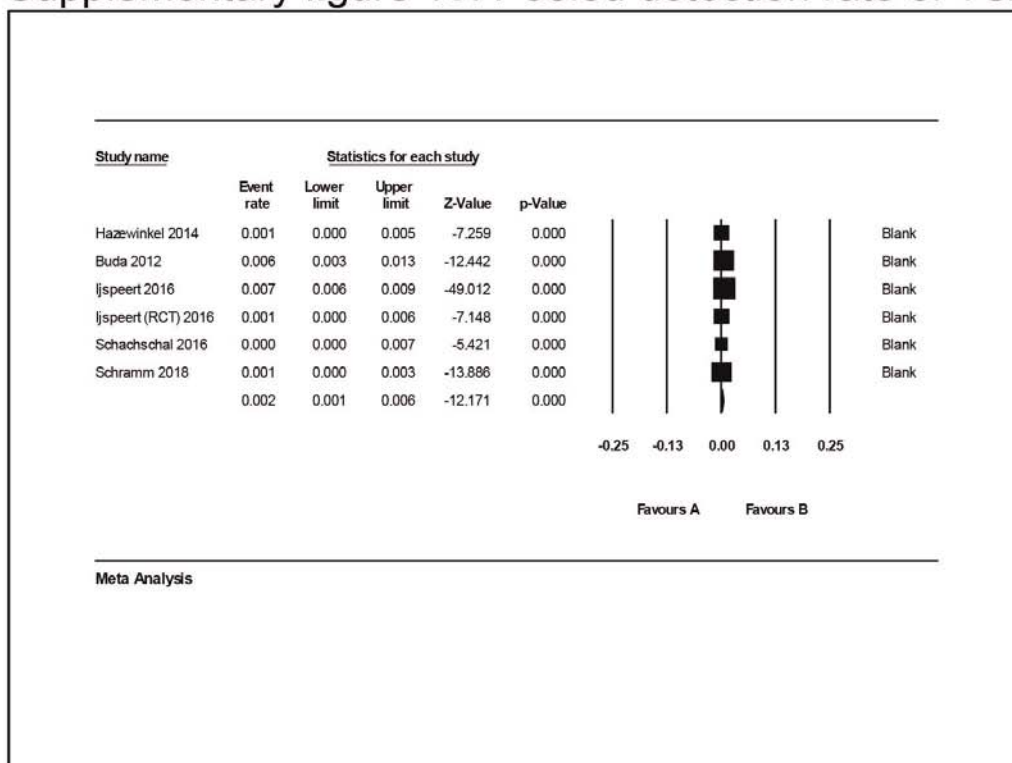

## Supplementary material

### Supplementary figure 11. Pooled detection rate of advanced adenoma detection rate

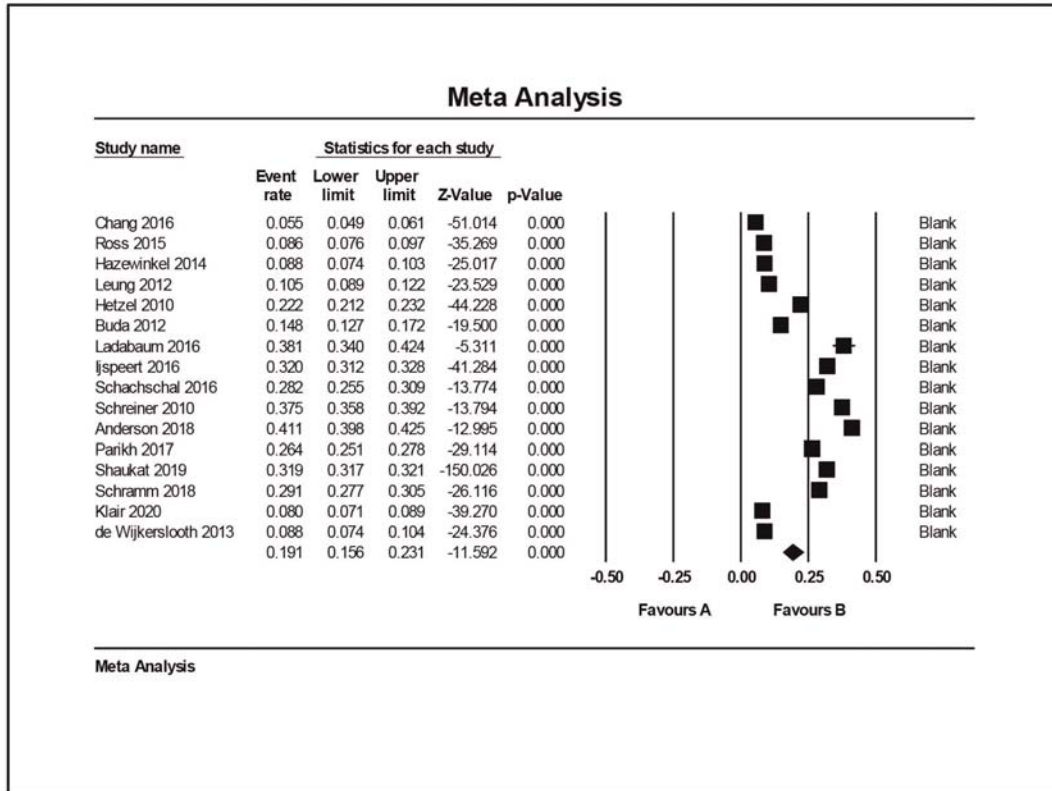

## Supplementary material

**Supplementary Table 1 a** Newcastle Ottawa Scale for assessment of quality of inclusion studies.

| Study name        | Selection                                |                                     |                           |                                                                          | Comparability | Outcome                                                         |                       |                                                 | Score |
|-------------------|------------------------------------------|-------------------------------------|---------------------------|--------------------------------------------------------------------------|---------------|-----------------------------------------------------------------|-----------------------|-------------------------------------------------|-------|
|                   | Representativeness of the exposed cohort | Selection of the non-exposed cohort | Ascertainment of exposure | Demonstration that outcome of interest was not present at start of study |               | Comparability of cohorts on the basis of the design or analysis | Assessment of outcome | Was follow-up long enough for outcomes to occur |       |
| Chang 2016        | *                                        | *                                   | *                         | *                                                                        |               | *                                                               | *                     | *                                               | 7     |
| Ross 2015         | *                                        | *                                   | *                         |                                                                          |               | *                                                               | *                     | *                                               | 6     |
| Sanaka 2014       | *                                        | *                                   | *                         |                                                                          |               | *                                                               | *                     | *                                               | 6     |
| Pereyra 2014      | *                                        | *                                   | *                         | *                                                                        |               | *                                                               | *                     | *                                               | 7     |
| Leung 2012        | *                                        | *                                   | *                         |                                                                          |               | *                                                               | *                     | *                                               | 6     |
| Kahi 2011         | *                                        | *                                   | *                         |                                                                          |               | *                                                               | *                     | *                                               | 6     |
| Hetzel 2010       | *                                        | *                                   | *                         |                                                                          |               | *                                                               | *                     | *                                               | 6     |
| Buda 2012         | *                                        | *                                   | *                         | *                                                                        |               | *                                                               | *                     | *                                               | 7     |
| Ladabaum 2016     | *                                        | *                                   | *                         | *                                                                        |               | *                                                               | *                     | *                                               | 7     |
| Ijspeert 2016     | *                                        | *                                   | *                         | *                                                                        |               | *                                                               | *                     | *                                               | 7     |
| Schachscharl 2016 | *                                        | *                                   | *                         |                                                                          |               | *                                                               | *                     | *                                               | 6     |
| Schreiner 2010    | *                                        | *                                   | *                         |                                                                          |               | *                                                               | *                     | *                                               | 6     |
| Anderson 2018     | *                                        | *                                   | *                         |                                                                          |               | *                                                               | *                     | *                                               | 6     |
| Anderson 2017     | *                                        | *                                   | *                         |                                                                          |               | *                                                               | *                     | *                                               | 6     |
| Parikh 2017       | *                                        | *                                   | *                         |                                                                          |               | *                                                               | *                     | *                                               | 6     |
| Shaukat 2019      | *                                        | *                                   | *                         |                                                                          |               | *                                                               | *                     | *                                               | 6     |
| Schramm 2018      | *                                        | *                                   | *                         |                                                                          |               | *                                                               | *                     | *                                               | 6     |
| Wijkerslooth 2013 | *                                        | *                                   | *                         | *                                                                        |               | *                                                               | *                     | *                                               | 7     |
| Klair 2020        | *                                        | *                                   | *                         |                                                                          |               | *                                                               | *                     | *                                               | 6     |
| Mandaliya 2019    | *                                        | *                                   | *                         |                                                                          |               | *                                                               | *                     | *                                               | 6     |

## Supplementary material

### b Cochrane risk of bias scale for RCTs

|                 | Random sequence generation (selection bias) | Allocation concealment (selection bias) | Blinding of participants and personnel (performance bias) | Blinding of outcome assessment (detection bias) | Incomplete outcome data (attrition bias) | Selective reporting (reporting bias) | Other bias |
|-----------------|---------------------------------------------|-----------------------------------------|-----------------------------------------------------------|-------------------------------------------------|------------------------------------------|--------------------------------------|------------|
| Hazewinkel 2014 | ?                                           | ⊖                                       | ?                                                         | ?                                               | +                                        | +                                    |            |
| Ijspeert 2016   | ⊖                                           | ⊖                                       | ?                                                         | ?                                               | +                                        | +                                    |            |
